# Supplementary material for: SARS-CoV-2 infection is associated with an increased risk of idiopathic acute pancreatitis but not pancreatic exocrine insufficiency or diabetes: long-term results of the COVIDPAN study
Source: HighWire-hosted journal article supplement (doi:10.1136/gutjnl-2021-326218), 2021-11-11
Supplement: gutjnl-2021-326218supp001_data_supplement.pdf [file gutjnl-2021-326218supp001_data_supplement.pdf]

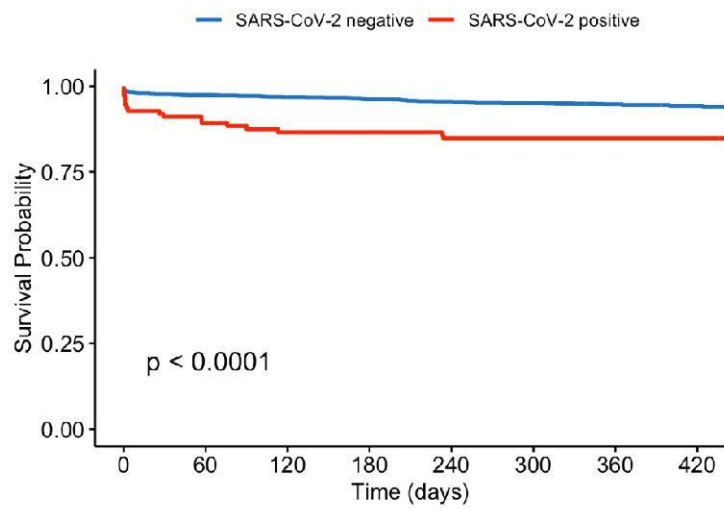

**Figure S1:** Kaplan-Meier survival curves of patients followed up after discharge from index admission for acute pancreatitis stratified by SARS-CoV-2 status
